# Supplementary material for: Scoping review of mental health in prisons through the COVID-19 pandemic
Source: PubMed Central journal article supplement — BMJ Open. 2021 May 11;11(5):e046547. doi: 10.1136/bmjopen-2020-046547 (PMC8727680; doi:10.1136/bmjopen-2020-046547), 2021-05-11
Supplement: bmjopen-2020-046547supp001.pdf [file bmjopen-2020-046547supp001.pdf]

## APPENDIX 1

The following subject headings were included as exploded terms for *prisons/prisoners* if present in the database: prison (EMBASE), prisons (PsycEXTRA, Medline, PsycINFO), prisoner (EMBASE), prisoners (PsycEXTRA, Medline, Global Health, CINAHL, psycINFO), prisoners of war (PsycEXTRA), prisoner abuse (PsycEXTRA, PsycINFO), criminal offenders (PsycEXTRA), Criminal Rehabilitation (PsycEXTRA), correctional institutions (Global Health), offender (EMBASE), prisoner nursing (EMBASE), correctional facilities personnel (CINAHL), correctional health services (CINAHL), correctional facilities (CINAHL), correctional health nursing (CINAHL), prison personnel (PsycINFO). These terms were combined with a text word search for the following: prison\* OR inmate OR inmates OR jail OR gaol\* OR correction\* facilit\* OR penitentiary\* OR penal institut\* OR detention camp\* OR custodial\* OR concentration camp\* OR incarcerate\* OR imprison\* OR correctional setting\* OR detain\* OR detention\* OR correction\* cent\* OR compulsory drug detention OR compulsory drug treatment OR compulsory rehabil\* OR "re-education through labor\*" OR laojiaosuo OR "long-term detention" OR labor\* camp\*. This search was performed in all databases looking only at the title and abstract of articles.

The following subject headings were included as exploded terms for *COVID-19* if present in the database: COVID-19 (CINAHL). These terms were combined with a text word search for the following: coronavirus\* OR coronovirus\* OR Wuhan OR "2019-nCoV" OR COVID OR "COVID-19" OR "CORVID-19" OR "CONVID-19" OR "WN-CoV" OR "HCoV-19" OR CoV OR "2019 novel" OR ncov OR "SARS-CoV-2" OR SARSCov19 OR ncov\*wuhan OR "novel betacov" OR "novel betacoronavirus". This search was performed in all databases looking only at the title and abstract of articles.

The *prisons/prisoners* category was combined with the AND operator with the *COVID-19* category. A limit based on publication date (from 2019 onwards) was applied. We then reviewed the results of these searches to remove duplicates and screen papers based on inclusion criteria.
