# Supplementary material for: Scoping review of mental health in prisons through the COVID-19 pandemic
Source: PubMed Central journal article supplement — BMJ Open. 2021 May 11;11(5):e046547. doi: 10.1136/bmjopen-2020-046547 (PMC8727680; doi:10.1136/bmjopen-2020-046547), 2021-05-11
Supplement: bmjopen-2020-046547supp003.pdf [file bmjopen-2020-046547supp003.pdf]

## APPENDIX 3

**Table 1: Systematic review and meta-analyses checklist**

| Checklist                                                                                                                                      | Study    |            |                    |            |               |
|------------------------------------------------------------------------------------------------------------------------------------------------|----------|------------|--------------------|------------|---------------|
|                                                                                                                                                | Carvalho | Chaimowitz | Chevance et al[37] | Kois et al | Pedrosa et al |
| Is the review based on a focused question that is adequately formulated and described?                                                         | No       | Yes        | No                 | No         | No            |
| Were eligibility criteria for included and excluded studies predefined and specified?                                                          | No       | No         | No                 | No         | No            |
| Did the literature search strategy use a comprehensive, systematic approach?                                                                   | Yes      | No         | No                 | No         | No            |
| Were titles, abstracts, and full-text articles dually and independently reviewed for inclusion and exclusion to minimize bias?                 | No       | No         | No                 | No         | No            |
| Was the quality of each included study rated independently by two or more reviewers using a standard method to appraise its internal validity? | No       | No         | No                 | No         | No            |
| Were the included studies listed along with important characteristics and results of each study?                                               | No       | No         | No                 | No         | No            |
| Was heterogeneity assessed? (This question applies only to meta-analyses.)                                                                     | N/A      | N/A        | N/A                | N/A        | N/A           |
| Overall quality rating                                                                                                                         | Poor     | Poor       | Poor               | Poor       | Poor          |

**Table 2: Observational Cohort and Cross-sectional studies**

| Checklist                                                                                                                                       | Bandara et al | Novisky et al |
|-------------------------------------------------------------------------------------------------------------------------------------------------|---------------|---------------|
| Was the research question or objective in this paper clearly stated?                                                                            | Yes           | Yes           |
| Was the study population clearly specified and defined?                                                                                         | Yes           | Yes           |
| Was the participation rate of eligible persons at least 50%?                                                                                    | Yes           | Yes           |
| Were all the subjects selected or recruited from the same or similar populations (including the same time period)? Were inclusion and exclusion | No            | Yes           |

|                                                                                                                                                                                                               |      |      |
|---------------------------------------------------------------------------------------------------------------------------------------------------------------------------------------------------------------|------|------|
| criteria for being in the study prespecified and applied uniformly to all participants?                                                                                                                       |      |      |
| Was a sample size justification, power description, or variance and effect estimates provided?                                                                                                                | No   | No   |
| For the analyses in this paper, were the exposure(s) of interest measured prior to the outcome(s) being measured?                                                                                             | NR   | NR   |
| Was the timeframe sufficient so that one could reasonably expect to see an association between exposure and outcome if it existed?                                                                            | Yes  | Yes  |
| For exposures that can vary in amount or level, did the study examine different levels of the exposure as related to the outcome (e.g., categories of exposure, or exposure measured as continuous variable)? | NR   | NR   |
| Were the exposure measures (independent variables) clearly defined, valid, reliable, and implemented consistently across all study participants?                                                              | NR   | NR   |
| Was the exposure(s) assessed more than once over time?                                                                                                                                                        | NR   | No   |
| Were the outcome measures (dependent variables) clearly defined, valid, reliable, and implemented consistently across all study participants?                                                                 | No   | No   |
| Were the outcome assessors blinded to the exposure status of participants?                                                                                                                                    | N/A  | N/A  |
| Was loss to follow-up after baseline 20% or less?                                                                                                                                                             | N/A  | N/A  |
| Were key potential confounding variables measured and adjusted statistically for their impact on the relationship between exposure(s) and outcome(s)?                                                         | No   | No   |
| Overall quality rating                                                                                                                                                                                        | Poor | Poor |

**Table 3: Qualitative studies**

| Checklist                                                                | Gonçalves et al | Maycock and Dickson | Testoni et al |
|--------------------------------------------------------------------------|-----------------|---------------------|---------------|
| Was there a clear statement of the aims of the research?                 | Yes             | Yes                 | Yes           |
| Is a qualitative methodology appropriate?                                | Yes             | Yes                 | Yes           |
| Was the research design appropriate to address the aims of the research? | Yes             | Yes                 | Yes           |

|                                                                                      |     |     |     |
|--------------------------------------------------------------------------------------|-----|-----|-----|
| Was the recruitment strategy appropriate to the aims of the research?                | Yes | Yes | Yes |
| Was the data collected in a way that addressed the research issue?                   | No  | Yes | Yes |
| Has the relationship between researcher and participants been adequately considered? | No  | No  | No  |
| Have ethical issues been taken into consideration?                                   | Yes | Yes | Yes |
| Was the data analysis sufficiently rigorous?                                         | No  | No  | Yes |
| Is there a clear statement of findings?                                              | No  | No  | No  |
